# Supplementary material for: Digital gene expression for non-model organisms
Source: HighWire-hosted journal article supplement (doi:10.1101/gr.122135.111), 2011-08-15
Supplement: Supplementary_Figures_and_Tables.pdf [file Supplementary_Figures_and_Tables.pdf]

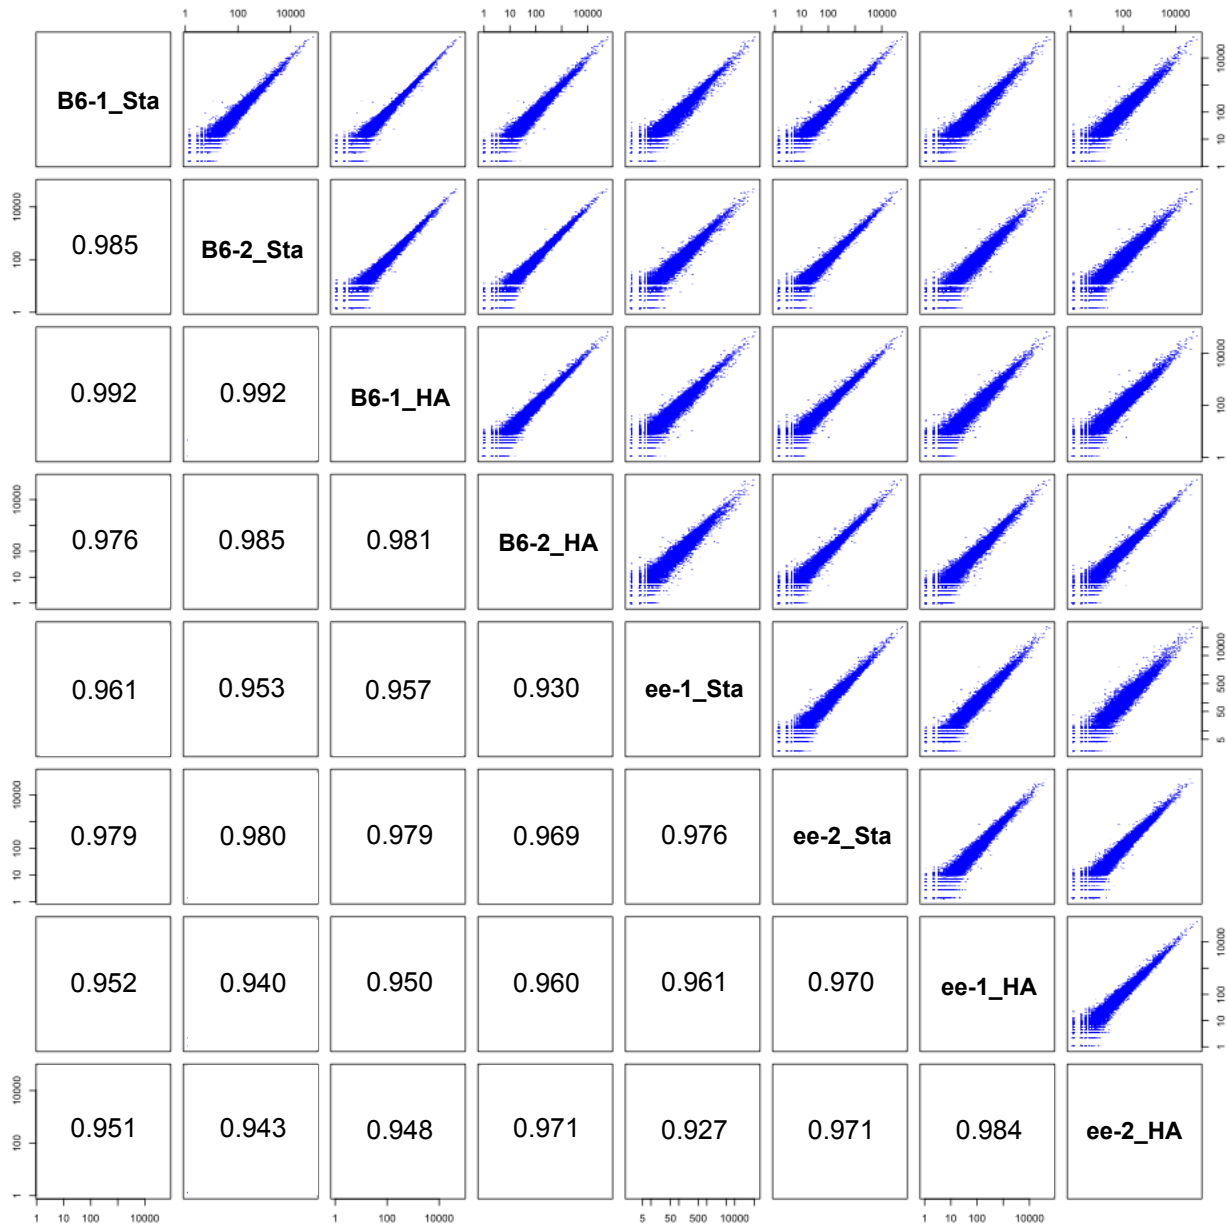

**Supplementary Figure 1.** Technical replicates of mouse EDGE libraries.

EDGE libraries from *Mc1r*<sup>+/+</sup> (B6-1 and B6-2) and *Mc1r*<sup>e/e</sup> (ee-1 and ee-2) were constructed from adult mouse skin. Each library was sequenced at two different locations, Stanford University (Sta) and HudsonAlpha Institute for Biotechnology (HA). Pairwise scatter plots comparing normalized gene counts are plotted on a log<sub>10</sub> scale above the diagonal. Pearson correlation coefficients are shown below the diagonal.

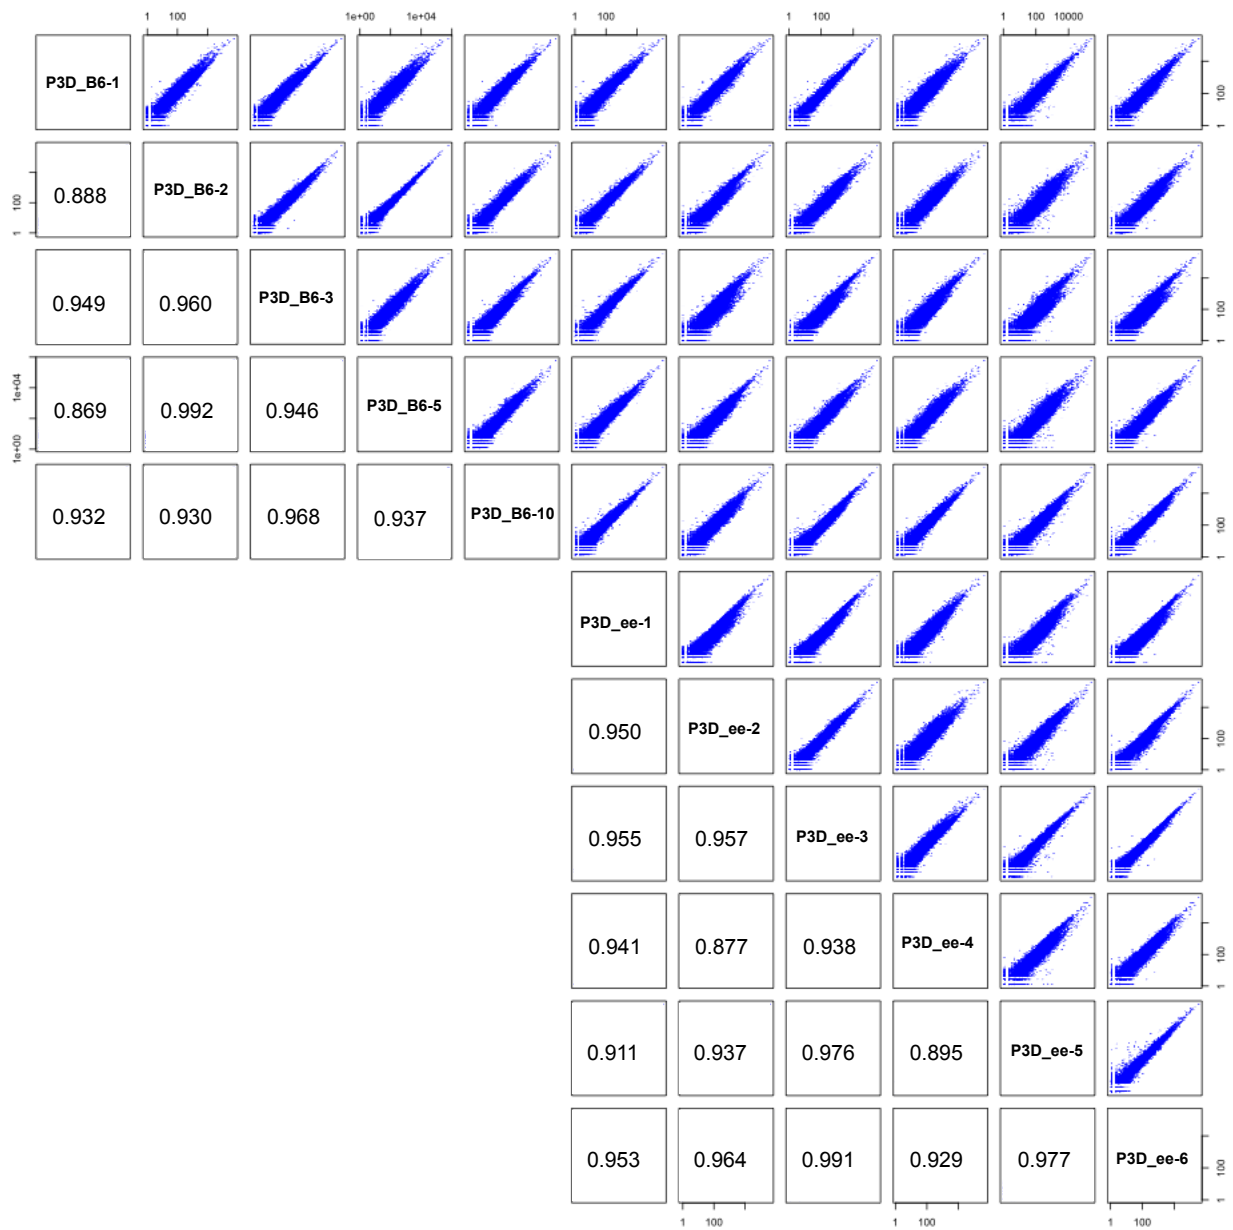

**Supplementary Figure 2A.** Biological replicates of mouse EDGE libraries from neonate dermis. Pairwise scatter plots comparing normalized gene counts between *Mc1r*<sup>+/+</sup> (B6) and *Mc1r*<sup>e/e</sup> (ee) EDGE libraries are plotted on a log<sub>10</sub> scale above the diagonal. Pearson correlation coefficients are shown below the diagonal.

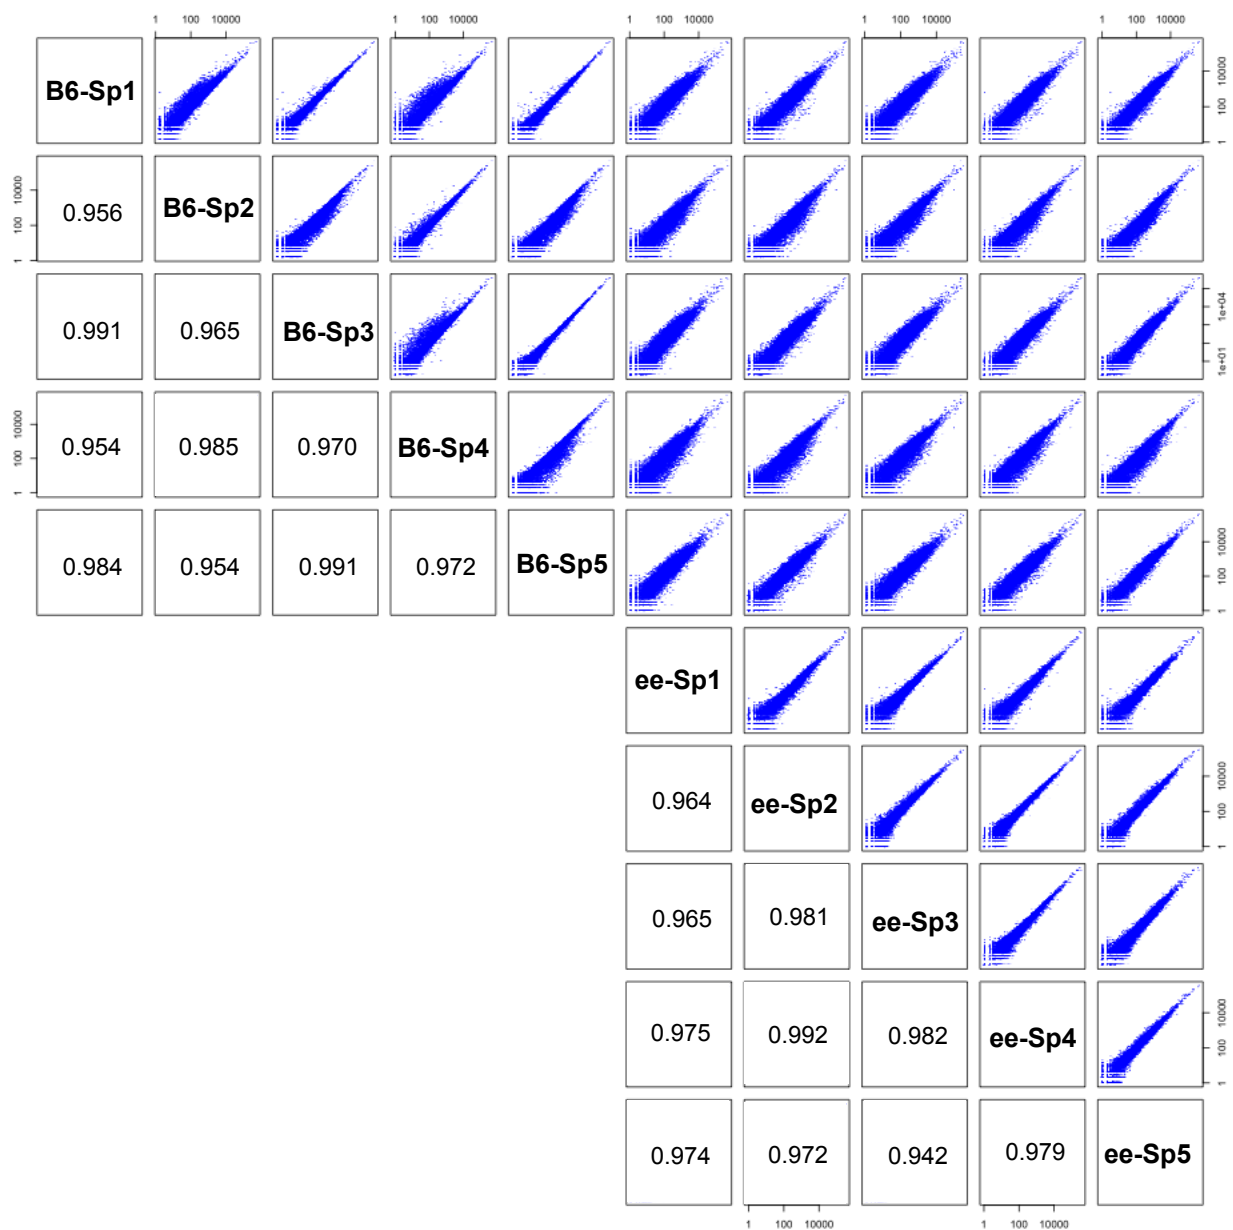

**Supplementary Figure 2B.** Biological replicates of mouse EDGE libraries from spleen. Pairwise scatter plots comparing normalized gene counts between *Mc1r*<sup>+/+</sup> (B6) and *Mc1r*<sup>e/e</sup> (ee) EDGE libraries are plotted on a log<sub>10</sub> scale above the diagonal. Pearson correlation coefficients are shown below the diagonal.

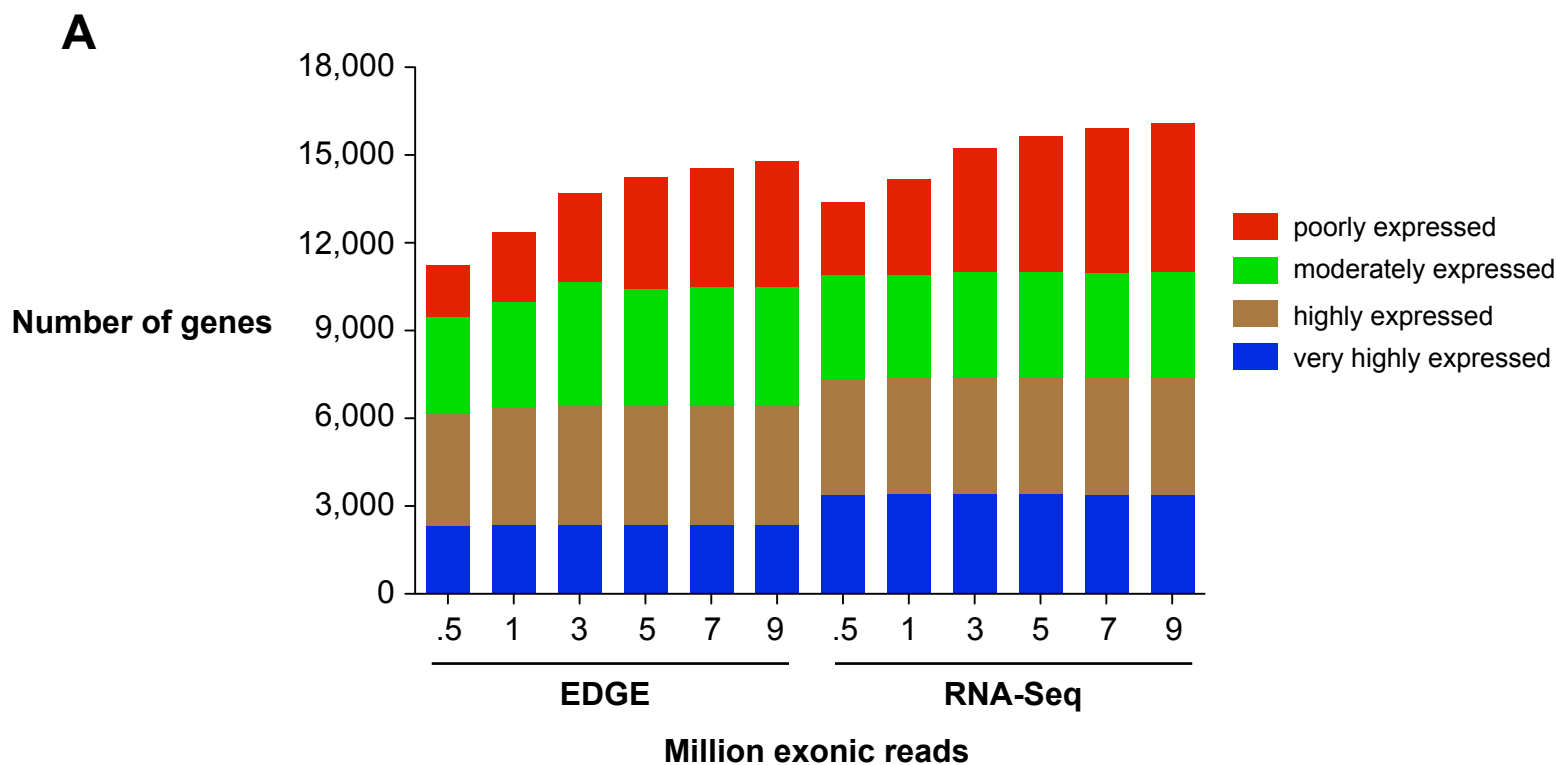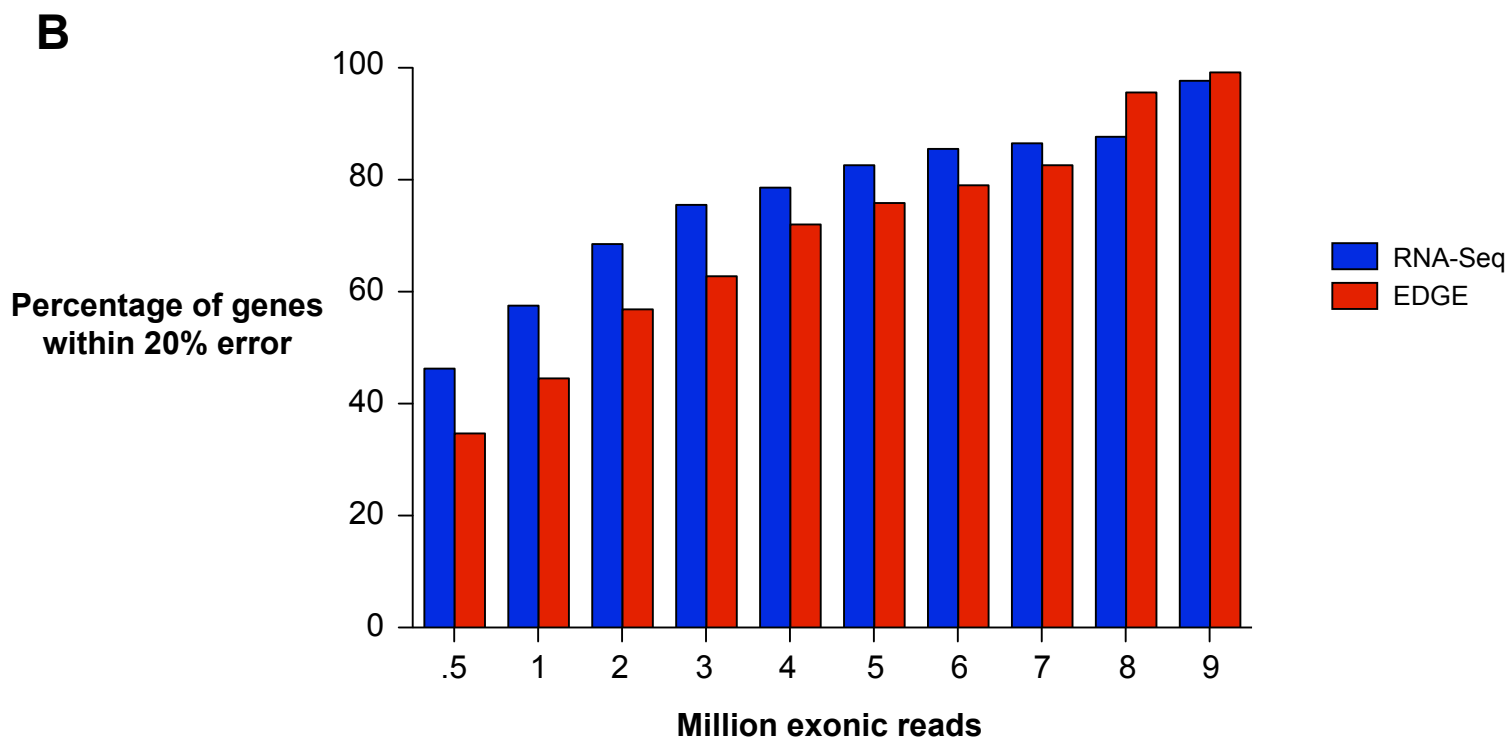

**Supplementary Figure 3. Sequencing depth analysis.**

EDGE and RNA-Seq libraries generated from a mouse neonatal dermis sample (each sequenced on one lane of the Illumina GAllx) were aligned to mouse RefSeq transcripts and the following characteristics were determined as a function of increasing sequencing depth:

(A) number of genes within each expression category (poorly expressed: <2 TPM or <1.5 RPKM, moderately expressed: 2 to 10 TPM or 1.5 to 5 RPKM, highly expressed: 10 to 50 TPM or 5 to 15 RPKM, very highly expressed: > 50 TPM or >15 RPKM).

(B) percentage of genes with TPM or RPKM values within 20% of the value for that gene in the total dataset.

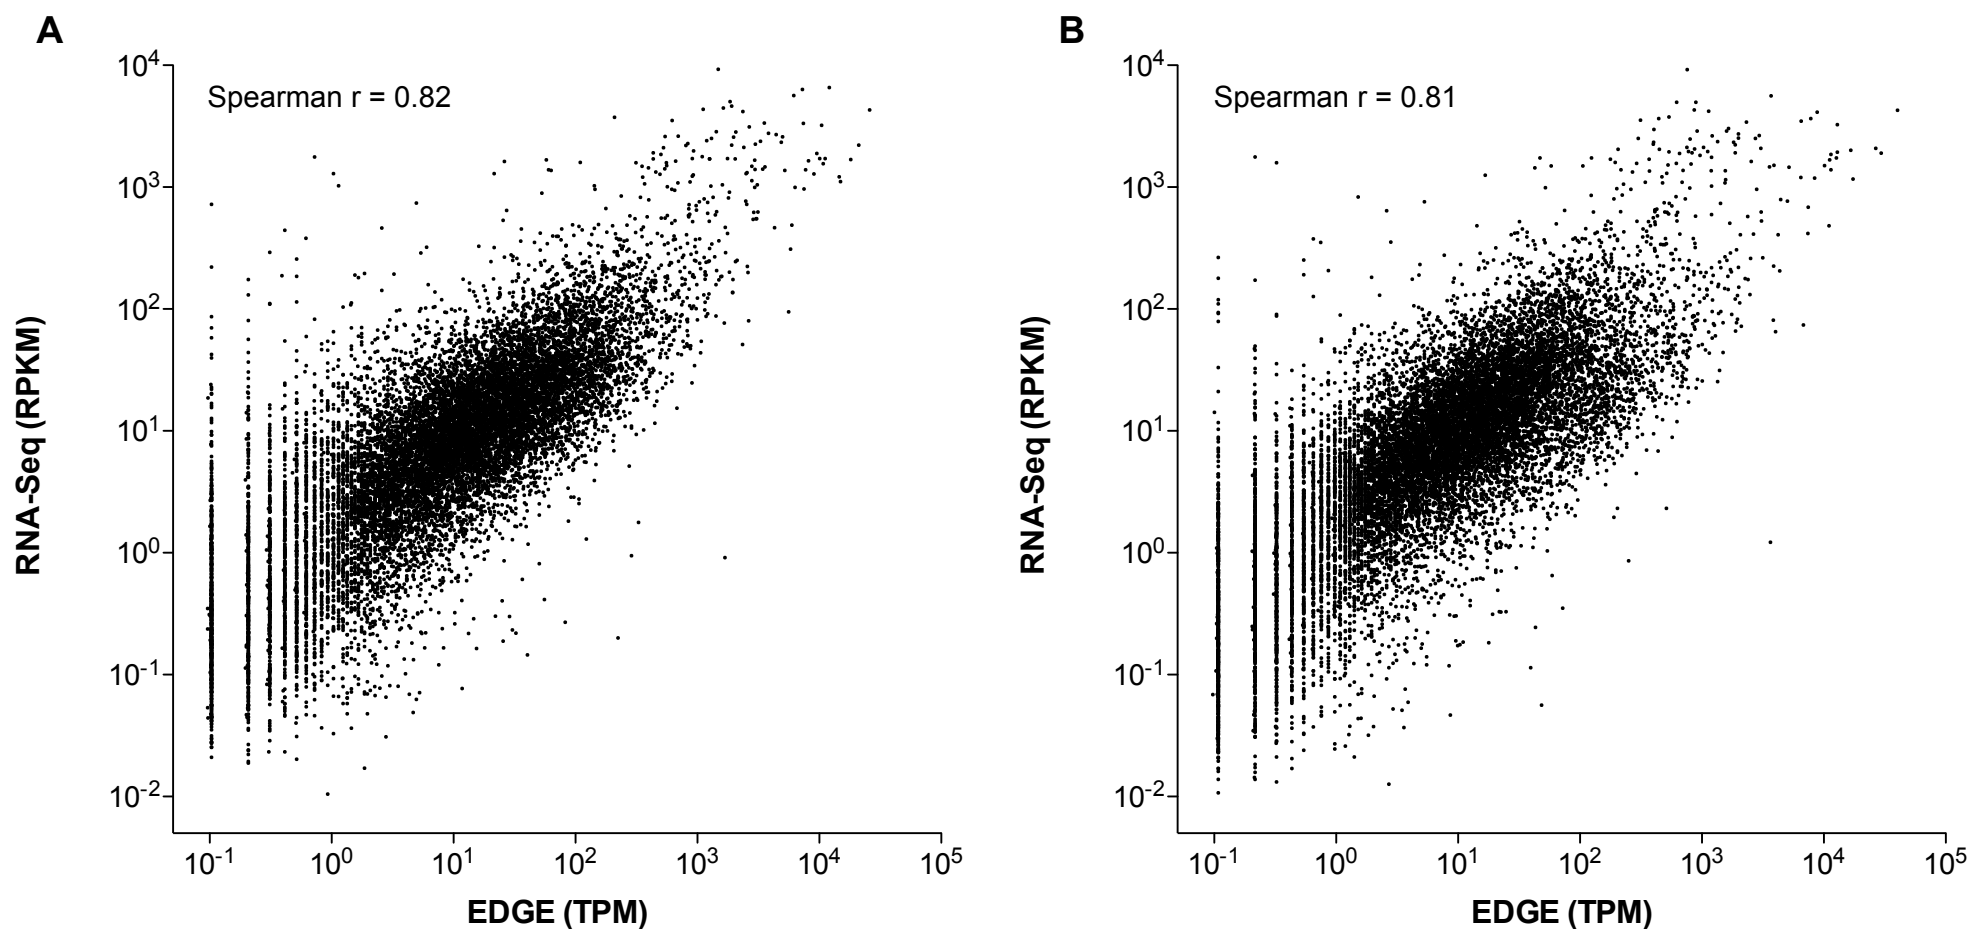

**Supplementary Figure 4.** RNA-Seq and EDGE provide similar assessments of relative transcript abundance. Relative transcript levels measured by RNA-Seq and EDGE were compared by plotting RPKM and TPM for each gene in (A) *Mc1r*<sup>+/+</sup> (Spearman  $r = 0.82$ ) and (B) *Mc1r*<sup>e/e</sup> (Spearman  $r = 0.81$ ) from mouse neonate dermis. Each point reflects the RPKM and TPM value from a single RNA-Seq and EDGE library.

**A**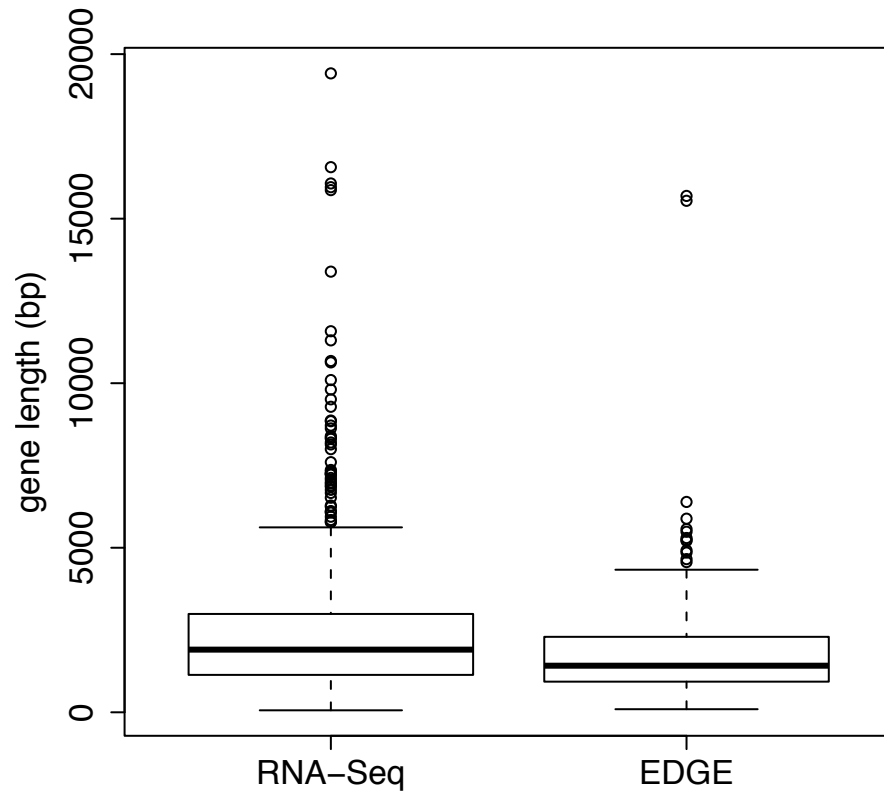**B**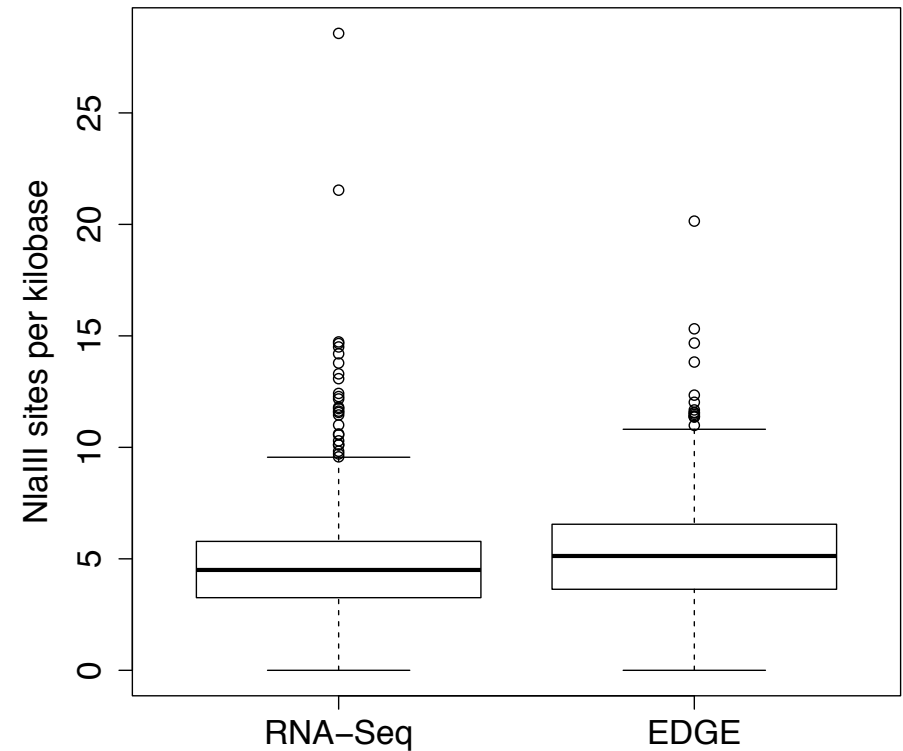

**Supplementary Figure 5.** Transcript length and *NlaIII* site frequency.

The 436 genes detected only by EDGE and 1,295 genes detected only by RNA-Seq were characterized for (A) transcript length and (B) frequency of *NlaIII* sites. (A) The average length of genes detected only by EDGE is 548 bp shorter than the genes detected only by RNA-Seq ( $p < 1e-8$ ). (B) Genes that were only detected by EDGE and genes that are only detected by RNA-Seq have 5.4 and 4.6 *NlaIII* sites per kilobase of transcript, respectively ( $p < 1e-6$ ).

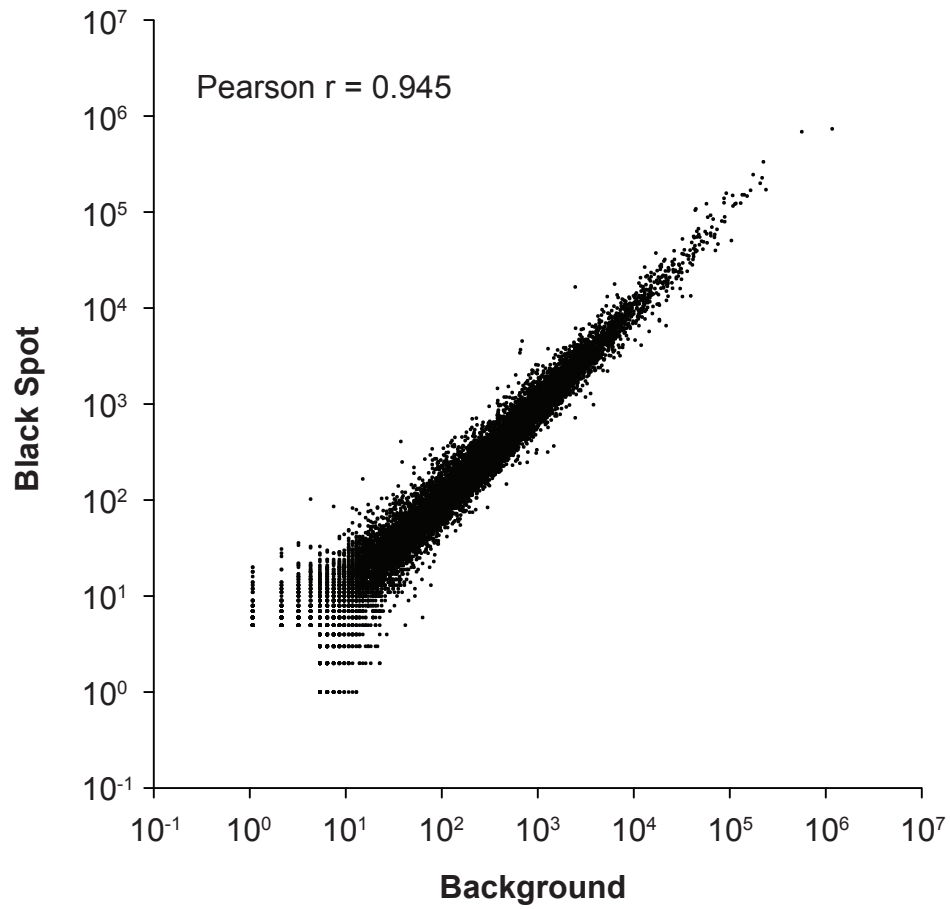

**Supplementary Figure 6.** EDGE in cheetah skin.

Normalized expression of 14,247 genes from the black spot and yellow background regions of cheetah skin was measured by EDGE and plotted on a  $\log_{10}$  scale. The two libraries are highly correlated (Pearson  $r = 0.945$ ).

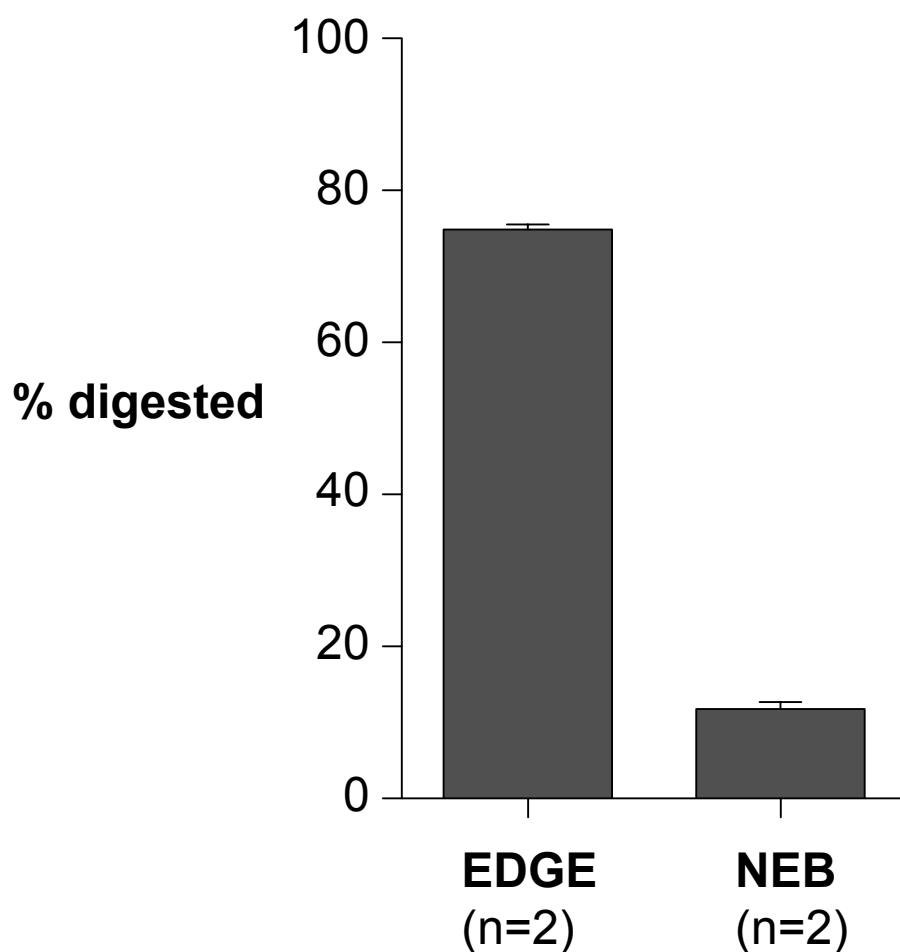

**Supplementary Figure 7. *EcoP15I* cleavage efficiency.**

DNA template carrying a single *EcoP15I* recognition site was generated by PCR and subjected to restriction digest with *EcoP15I* for 16 hours at 37°C. Duplicate reactions were set up according to the reaction conditions in the EDGE protocol or with standard NEB conditions to quantify the relative efficiency of restriction digest. The EDGE protocol improved the efficiency of *EcoP15I* cleavage by ~6.4-fold relative to standard NEB conditions ( $p = 0.0003$ ).



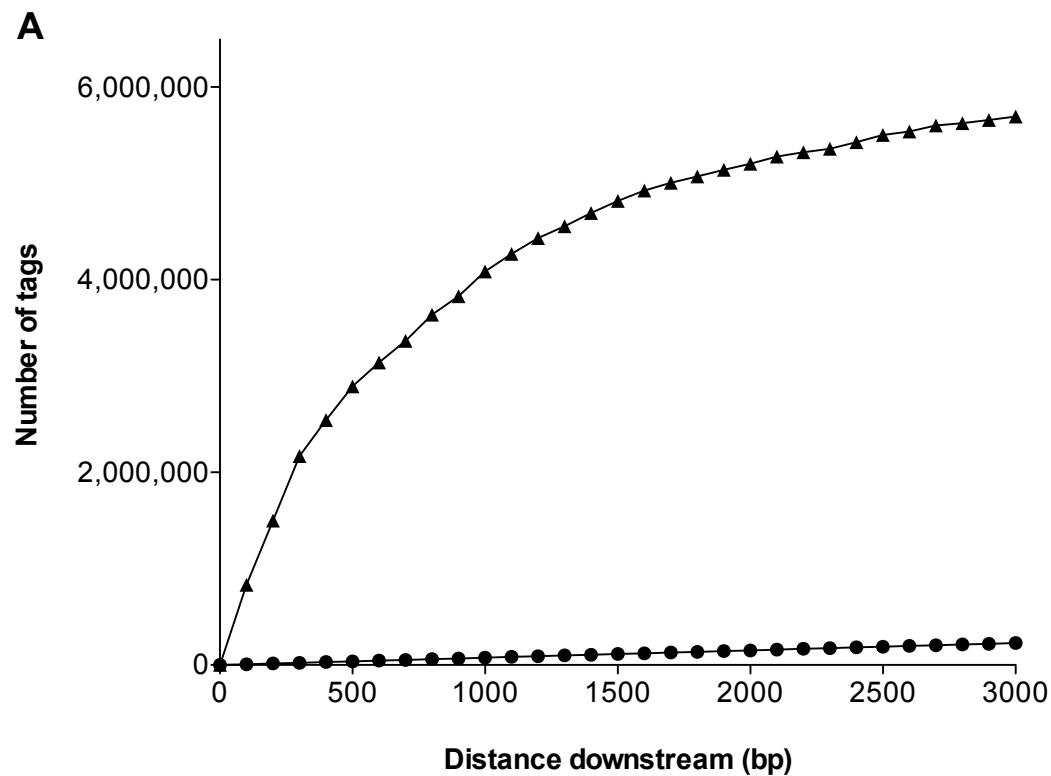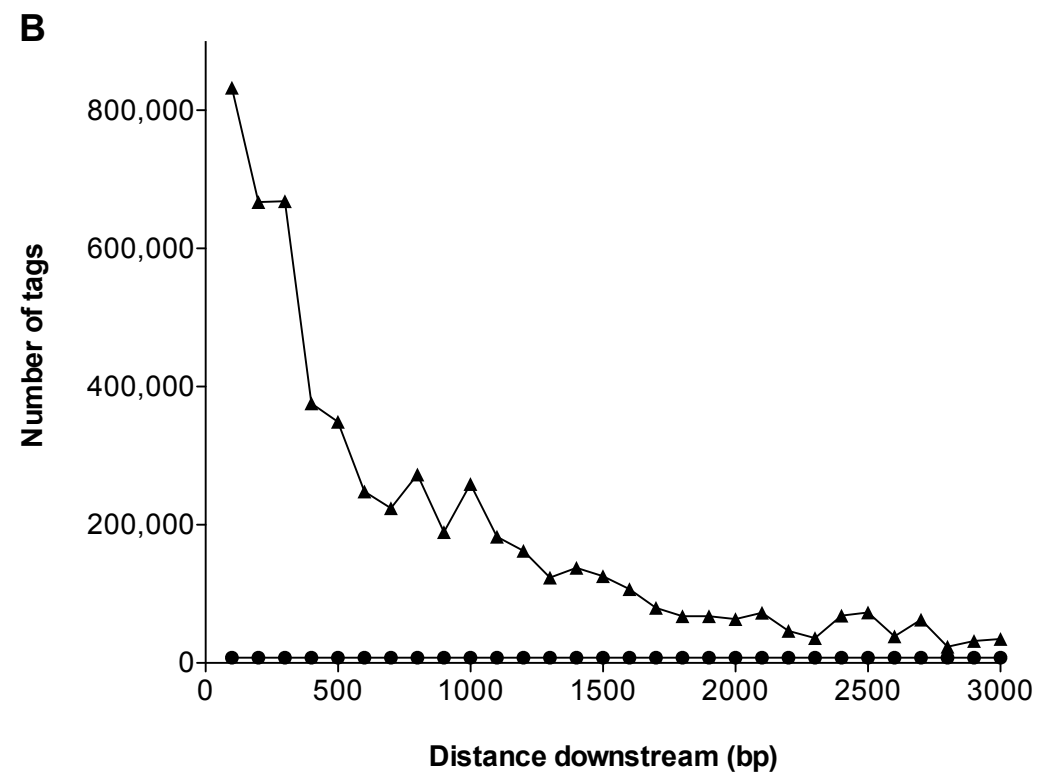

**Supplementary Figure 8.** Significant enrichment of cheetah EDGE tags downstream of *F. catus* Ensembl transcripts. Representative data from one cheetah EDGE library showing the enrichment of EDGE tags in the three-kilobase region immediately downstream of annotated *F. catus* Ensembl transcripts. (A) shows the increasing number of EDGE tags as horse transcripts are artificially extended in the 3'-direction, while (B) shows the number of EDGE tags that align within each 100 bp interval.

—▲ Frequency of tags observed

—● Expected frequency of tags if all “non-exonic” tags mapped randomly across the intergenic space

**Supplementary Table 1.** PANTHER functional enrichment analysis.

| Functional classification    | Ontology           | Expression in mutant tissue | P-value (neonate dermis) | P-value (spleen) |
|------------------------------|--------------------|-----------------------------|--------------------------|------------------|
| Receptor activity            | Molecular function | Up                          | 2.01E-03                 | 1.05E-05         |
| Response to interferon-gamma | Biological process | Down                        | 7.91E-03                 | 1.52E-03         |
| Signal transduction          | Biological process | Up                          | 3.14E-03                 | 4.05E-03         |
| Cell communication           | Biological process | Up                          | 6.26E-03                 | 9.53E-03         |

Statistically over-represented PANTHER functional classification categories within the differentially expressed genes in mouse neonate dermis (327 genes) and spleen (945 genes) were determined by using a binomial statistic tool described in Cho & Campbell (2000). Functional classification categories that were shared between both tissues are shown (p-value < 0.01). At least three genes were required for each category and genes that were detected by EDGE were used as the reference for each tissue.

**Supplementary Table 2.** Downregulated genes in *Mclr<sup>e/e</sup>* neonate dermis have known or predicted functions in innate immunity.

| Gene           | Average TPM <sup>a</sup> |        | Fold difference <sup>b</sup> | Function                                                                                                                                                                                                                                                  |
|----------------|--------------------------|--------|------------------------------|-----------------------------------------------------------------------------------------------------------------------------------------------------------------------------------------------------------------------------------------------------------|
|                | Wild type                | Mutant |                              |                                                                                                                                                                                                                                                           |
| <i>Ifit1</i>   | 6.8                      | 0.06   | -113.3                       | interferon-induced protein with tetratricopeptide repeats 1                                                                                                                                                                                               |
| <i>Oas2</i>    | 1.2                      | 0      | -∞                           | induced by interferons and uses adenosine triphosphate in 2'-specific nucleotidyl transfer reactions to synthesize 2',5'-oligoadenylates, which then activate latent RNase L and results in viral RNA degradation and the inhibition of viral replication |
| <i>Oasl2</i>   | 1.9                      | 0.08   | -23.8                        | 2'-5' oligoadenylate synthetase-like 2                                                                                                                                                                                                                    |
| <i>Zbp1</i>    | 10.6                     | 1.0    | -10.6                        | Pattern recognition receptor that mediates IFNalpha/beta responses to cytosolic DNA in mice.                                                                                                                                                              |
| <i>Usp18</i>   | 3.0                      | 0.4    | -7.5                         | Removes ubiquitin adducts from a broad range of protein substrates. Identified in a screen for interferon-stimulated genes.                                                                                                                               |
| <i>Ccdc86</i>  | 24.0                     | 7.4    | -3.2                         | identified as a novel immediate-early cytokine-responsive gene induced in a hematopoietic cell line by interleukin 3                                                                                                                                      |
| <i>Gm12250</i> | 0.7                      | 0.06   | -11.7                        | interferon-gamma-inducible p47 GTPase. Plays a role in the intracellular resistance to <i>Chlamydia trichomatis</i> .                                                                                                                                     |
| <i>ligp1</i>   | 0.7                      | 0.02   | -35                          | interferon inducible GTPase 1, strongly induced transcriptionally by interferons and implicated in cell-autonomous resistance to intracellular pathogens.                                                                                                 |

<sup>a</sup> Average of five *Mclr<sup>+/+</sup>* and six *Mclr<sup>e/e</sup>* EDGE libraries.

<sup>b</sup> Relative to wild type.

**Supplementary Table 3.** Downregulated genes in *Mc1r<sup>el/e</sup>* spleen have known or predicted functions in innate immunity.

| Gene          | Average TPM <sup>a</sup> |        | Fold difference <sup>b</sup> | Function                                                                                                                                                                                                                                                   |
|---------------|--------------------------|--------|------------------------------|------------------------------------------------------------------------------------------------------------------------------------------------------------------------------------------------------------------------------------------------------------|
|               | Wild type                | Mutant |                              |                                                                                                                                                                                                                                                            |
| <i>Oas2</i>   | 26.5                     | 4.8    | -5.5                         | induced by interferons and uses adenosine triphosphate in 2'-specific nucleotidyl transfer reactions to synthesize 2',5'-oligoadenylates, which then activate latent RNase L and results in viral RNA degradation and the inhibition of viral replication. |
| <i>Oasl1</i>  | 12.4                     | 1.4    | -8.6                         | 2'-5' oligoadenylate synthetase-like 1.                                                                                                                                                                                                                    |
| <i>ligp1</i>  | 50.6                     | 12.3   | -4.1                         | interferon inducible GTPase 1, strongly induced transcriptionally by interferons and implicated in cell-autonomous resistance to intracellular pathogens.                                                                                                  |
| <i>Irgm1</i>  | 18.1                     | 4.6    | -3.9                         | IFN-gamma inducible; involved in host resistance against intracellular pathogens.                                                                                                                                                                          |
| <i>Gbp2</i>   | 50.3                     | 13.4   | -3.8                         | Guanylate binding protein upregulated during bacteria and protozoan infection.                                                                                                                                                                             |
| <i>Gbp4</i>   | 23.2                     | 8.4    | -2.8                         | Guanylate binding protein upregulated during bacteria and protozoan infection.                                                                                                                                                                             |
| <i>Gbp5</i>   | 7.4                      | 3.1    | -2.4                         | Guanylate binding protein upregulated during bacteria and protozoan infection.                                                                                                                                                                             |
| <i>Irf1</i>   | 796                      | 175    | -4.5                         | Interferon regulatory factor. Stimulates expression of interferon-inducible genes. Enhances TLR-dependent gene induction in IFN-gamma treated cells.                                                                                                       |
| <i>Irf3</i>   | 215                      | 51.5   | -4.2                         | Induces type I IFN and cytokines upon virus infection, TLR stimulation and cytosolic DNA stimulation.                                                                                                                                                      |
| <i>Irf9</i>   | 313                      | 124    | -2.5                         | Binds to STAT1 and STAT2 to form ISGF3 and stimulates type I IFN-inducible genes.                                                                                                                                                                          |
| <i>Aim2</i>   | 21.4                     | 10.2   | -2.1                         | Recognizes cytosolic DNA from bacteria and viruses and induces the formation of a caspase-1-activating inflammasome.                                                                                                                                       |
| <i>Trim21</i> | 19.3                     | 6.8    | -2.8                         | TRIM21 is significantly induced and interacts with IRF3 during virus infection and is required for IRF3-mediated antiviral responses.                                                                                                                      |
| <i>Trim11</i> | 26.6                     | 13.7   | -1.9                         | TRIM11 is involved in the endogenous restriction of retroviruses                                                                                                                                                                                           |
| <i>Trim3</i>  | 4.3                      | 1.2    | -3.6                         | Members of TRIM family of E3 ligases have been shown to exhibit antiviral                                                                                                                                                                                  |

|               |       |      |      |                                                                                                                                                      |
|---------------|-------|------|------|------------------------------------------------------------------------------------------------------------------------------------------------------|
| <i>Trim3</i>  | 4.3   | 1.2  | -3.6 | Members of TRIM family of E3 ligases have been shown to exhibit antiviral activities.                                                                |
| <i>Trim39</i> | 75.3  | 23.1 | -3.3 | Members of TRIM family of E3 ligases have been shown to exhibit antiviral activities.                                                                |
| <i>Jak1</i>   | 108.6 | 22.5 | -4.8 | Protein-tyrosine kinase that is required for IFN-alpha, -beta and -gamma signal transduction pathways.                                               |
| <i>Tyk2</i>   | 24.9  | 6.1  | -4.1 | Protein-tyrosine kinase required for interferon signal transduction. Impaired type I and II interferon signaling in <i>Tyk2</i> <sup>-/-</sup> mice. |

<sup>a</sup> Average of five *Mclr*<sup>+/+</sup> and five *Mclr*<sup>e/e</sup> EDGE libraries.

<sup>b</sup> Relative to wild type.

**Supplementary Table 4.** Comparison of EDGE and RNA-Seq using incomplete reference transcriptome.

|                                            | EDGE                   |                                      | RNA-Seq                 |                                      |
|--------------------------------------------|------------------------|--------------------------------------|-------------------------|--------------------------------------|
| Fastq reads                                | 11,826,345             |                                      | 16,672,771              |                                      |
| Mouse RefSeq transcriptome <sup>†</sup>    | Complete               | Incomplete                           | Complete                | Incomplete                           |
| Correctly assigned to gene                 | 9,987,929 <sup>A</sup> | 3,410,058 <sup>B</sup> (B/A = 34.1%) | 10,666,566 <sup>A</sup> | 3,446,658 <sup>B</sup> (B/A = 32.3%) |
| Incorrectly assigned to gene <sup>††</sup> |                        | 302,661 <sup>C</sup> (C/B = 8.9%)    |                         | 303,960 <sup>C</sup> (C/B = 8.8%)    |

<sup>†</sup> The existing mouse RefSeq transcriptome (referred to as “complete”) and a simulated incomplete transcriptome (referred to as “incomplete”) were used to align fastq reads from EDGE and RNA-Seq libraries from a mouse neonatal dermis sample.

<sup>††</sup> Reads that could have arisen from multiple locations in the full transcriptome and were incorrectly assigned to genes in the incomplete reference.
